# Supplementary material
Source: PubMed Central journal article supplement (PMC9517717)
Supplement: jvi.00921-22-s0001.pdf [file jvi.00921-22-s0001.pdf]

1 **Supplemental Table 1.** Comparison of Intergenic Sequences and Transcriptional Start and Stop  
 2 Signals of AngV and other HNV.

| Intergenic Region | Virus | Gene Stop   | Junction | Gene Start  |
|-------------------|-------|-------------|----------|-------------|
| N-P               | AngV  | TTAGAAAAAA  | CTT      | AGGAGCCAAGT |
|                   | NiV   | TTAAGAAAAA  | CTT      | AGGAACCAAGA |
|                   | HeV   | TTAAGAAAAA  | CTT      | AGGATCCAAGA |
|                   | MojV  | TTAAACAAAA  | CTT      | AGGATCCAAG  |
|                   | CedV  | TTACAAAAAA  | CTT      | AGGATCCAAG  |
|                   | GhV   | CTATAAAAAA  | CTT      | AGGATCACAA  |
|                   | GAKV  | TTAAGAAAAA  | CTT      | AAGAATCAAA  |
|                   | DARV  | TTATAAAAAA  | CTT      | AGGATGCAAG  |
| P-M               | AngV  | TTATAAAAAA  | CTT      | AGGATCAACGA |
|                   | NiV   | TTAAGAAAAA  | CTT      | AGGAGACAGGT |
|                   | HeV   | TTAAGAAAAA  | CTT      | AGGAGACAGGT |
|                   | MojV  | TCATAAAAAA  | CTT      | AGGAGTCAAG  |
|                   | CedV  | TTAGAAAAAA  | CTT      | AGGATCCCAG  |
|                   | GhV   | AGGATCACAA  | CTT      | AGGGATCAAG  |
|                   | GAKV  | TTAAGAAAAA  | CTT      | AAGAGTCAAA  |
|                   | DARV  | TTAAGAAAAA  | CTT      | AGGGGTAAAG  |
| M-F               | AngV  | TTAAGGAAAA  | CTT      | AGGAGTAAAGC |
|                   | NiV   | TTACAAAAAA  | CTT      | AGGAGCCAAGC |
|                   | HeV   | TTAAGAAAAA  | CTT      | AGGAGCCAAGT |
|                   | MojV  | ATATAAAAAA  | CTT      | AGGTGTCAAG  |
|                   | CedV  | TTAAGAAAAA  | CTT      | AGGATCCCAG  |
|                   | GhV   | CTAAACAAAA  | CTT      | AGGAAATCAG  |
|                   | GAKV  | TTAGAAAAAA  | CTT      | AAGAATCAAA  |
|                   | DARV  | TTAAAGAAAA  | CTT      | AGGACGTCAA  |
| F-G               | AngV  | TTAGAAAAAA  | CTT      | AGGATCCAAG  |
|                   | NiV   | TTAATAAAAAA | CTT      | AGGACCCAGGT |
|                   | HeV   | TTACAAAAAA  | CTT      | AGGACCCAAGT |
|                   | MojV  | TTAATAAAAA  | CTT      | AGGAGTCAGG  |
|                   | CedV  | TTAATAAAAA  | CTT      | AGGATCCCAG  |
|                   | GhV   | AATTAAGGAA  | CTT      | AATAATCGAG  |
|                   | GAKV  | TTAAGAAAAA  | CTT      | AAGAATCAAA  |
|                   | DARV  | TTATAAAAAA  | CTT      | AGGGGTCAAG  |
| G-L               | AngV  | TTAAGAAAAA  | CTT      | AGGAGTAATGT |
|                   | NiV   | TTAAGAAAAA  | CTT      | AGGACCCAGGT |
|                   | HeV   | TTAAGAAAAA  | CTT      | AGGACCCAAGT |
|                   | MojV  | TTACAAAAAA  | CTT      | AGGATTCACG  |
|                   | CedV  | TTAAAGAAAA  | CTT      | AGGATCCCAG  |
|                   | GhV   | CTAAGAAAAA  | CTT      | AGGAATTCAG  |
|                   | GAKV  | TTAAGAAAAA  | CTT      | AAGAATCAAA  |
|                   | DARV  | TTAAGAAAAA  | CTT      | AGGTGCAATG  |
| L                 | AngV  | TTAAGAAAAA  | CTT      |             |
|                   | NiV   | TTAAGAAAAA  | CTT      |             |
|                   | HeV   | TTAAGAAAAA  | CTT      |             |
|                   | MojV  | TTAATAAAAA  | CTT      |             |
|                   | CedV  | TTAAAGAAAA  | CTT      |             |
|                   | GhV   | TTAAGAAAAA  | CTT      |             |
|                   | GAKV  | TTAAGAAAAA  | CTT      |             |
|                   | DARV  | ATATAAAAAA  | CTT      |             |

5 **Supplemental Table 2.** Comparison of 5' and 3' untranslated regions of AngV and other HNVs.

| Gene | Virus | 5' untranslated |            | 3' untranslated |            |
|------|-------|-----------------|------------|-----------------|------------|
|      |       | Length          | % Homology | Length          | % Homology |
| N    | AngV  |                 |            | 262             |            |
|      | NiV   |                 |            | 576             | 32.5       |
|      | HeV   |                 |            | 558             | 34.8       |
|      | MojV  |                 |            | 154             | 36.2       |
|      | CedV  |                 |            | 334             | 39.5       |
|      | GhV   |                 |            | 294             | 38.7       |
|      | GAKV  |                 |            | 326             | 47.0       |
|      | DARV  |                 |            | 458             | 39.2       |
| P    | AngV  | 221             |            | 56              |            |
|      | NiV   | 94              | 33.3       | 459             | 12.8       |
|      | HeV   | 95              | 34.5       | 459             | 17.6       |
|      | MojV  | 254             | 43.7       | 134             | 43.7       |
|      | CedV  | 98              | 35.5       | 192             | 19.0       |
|      | GhV   | 236             | 42.7       | 213             | 20.5       |
|      | GAKV  | 132             | 35.3       | 317             | 13.9       |
|      | DARV  | 324             | 35.8       | 199             | 52.2       |
| M    | AngV  | 33              |            | 23              |            |
|      | NiV   | 89              | 26.8       | 190             | 64.0       |
|      | HeV   | 89              | 57.6       | 190             | 18.6       |
|      | MojV  | 39              | 36.4       | 445             | 44.2       |
|      | CedV  | 114             | 24.3       | 408             | 7.6        |
|      | GhV   | 243             | 11.9       | 314             | 23.9       |
|      | GAKV  | 49              | 54.5       | 326             | 20.0       |
|      | DARV  | 165             | 20.0       | 527             | 5.1        |
| F    | AngV  | 149             |            | 30              |            |
|      | NiV   | 273             | 36.6       | 401             | 9.2        |
|      | HeV   | 261             | 34.6       | 408             | 6.7        |
|      | MojV  | 942             | 12.7       | 163             | 28.6       |
|      | CedV  | 276             | 38.9       | 88              | 23.5       |
|      | GhV   | 391             | 22.7       | 59              | 40.9       |
|      | GAKV  | 844             | 18.2       | 340             | 10.6       |
|      | DARV  | 988             | 17.5       | 65              | 42.4       |
| G    | AngV  | 82              |            | 223             |            |
|      | NiV   | 222             | 25.7       | 494             | 30.8       |
|      | HeV   | 222             | 27.5       | 506             | 29.4       |
|      | MojV  | 111             | 49.4       | 533             | 32.4       |
|      | CedV  | 98              | 42.0       | 139             | 40.8       |
|      | GhV   | 201             | 26.8       | 223             | 20.7       |
|      | GAKV  | 134             | 39.2       | 440             | 30.8       |
|      | DARV  | 289             | 29.4       | 529             | 36.0       |
| L    | AngV  | 245             |            | 65              |            |
|      | NiV   | 142             | 38.1       | 57              | 45.5       |
|      | HeV   | 142             | 40.0       | 57              | 40.0       |
|      | MojV  | 212             | 44.6       | 40              | 35.8       |
|      | CedV  | 293             | 42.1       | 63              | 50.8       |
|      | GhV   | 576             | 29.0       | 67              | 36.9       |
|      | GAKV  | 355             | 41.1       | 14              | 64.3       |
|      | DARV  | 593             | 28.6       | 68              | 32.6       |

6

7



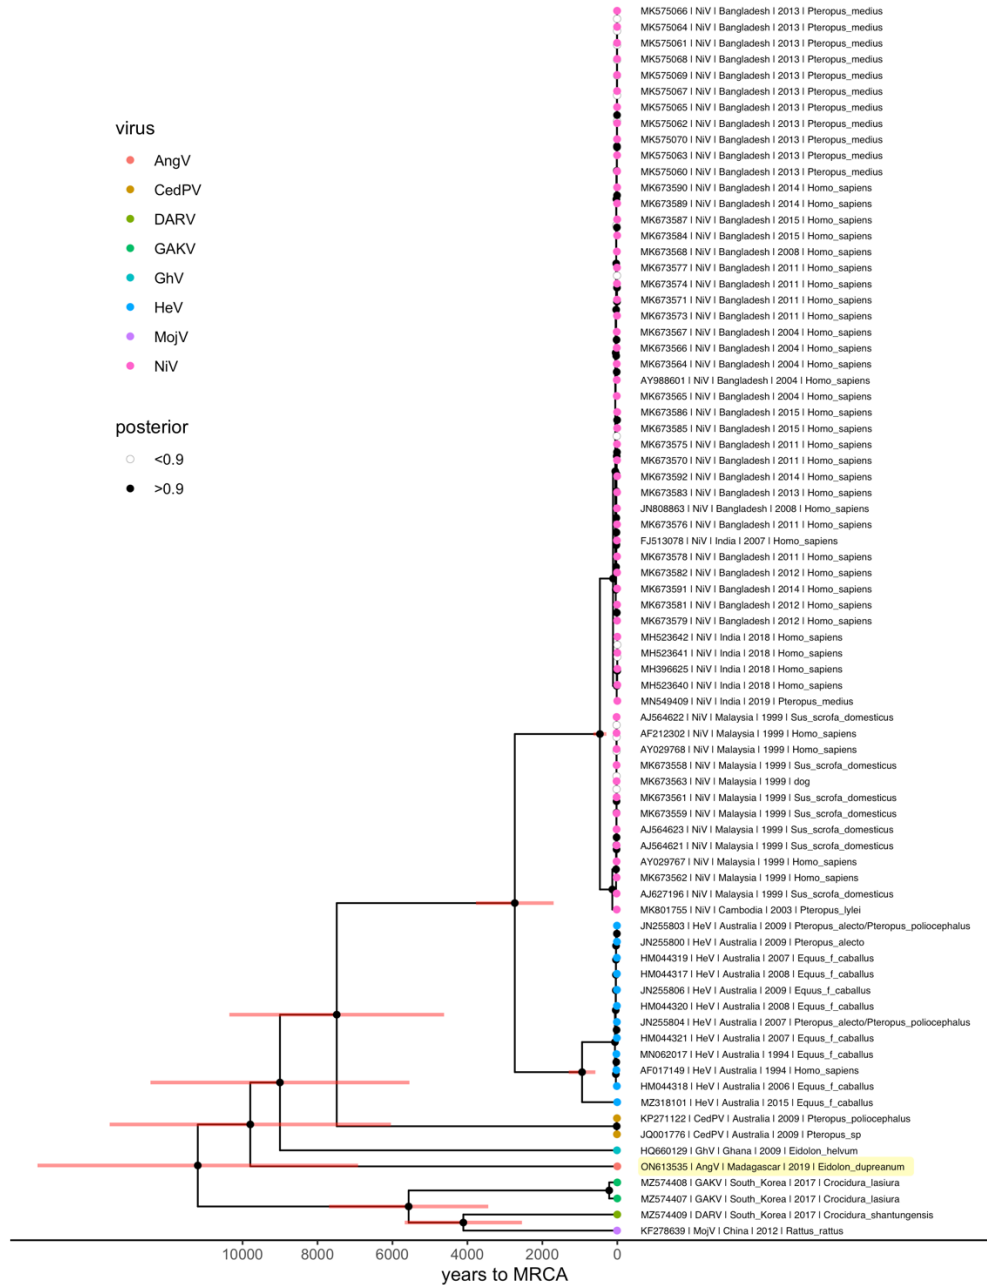

18

19 **Supplemental Figure 2.** Uncollapsed Bayesian skyline plot of all available *Henipavirus* whole  
 20 genomes, with the addition of newly discovered GAKV, DARV, and AngV. Nodes with 95%  
 21 credibility interval are depicted as red lines. *Henipavirus* species are highlighted by colored tip  
 22 points. The estimated time to MRCA for Angavokely virus and the previously-described bat-  
 23 borne HNVs is 9,794 (95% HPD: 6,519 – 14,025) years ago.

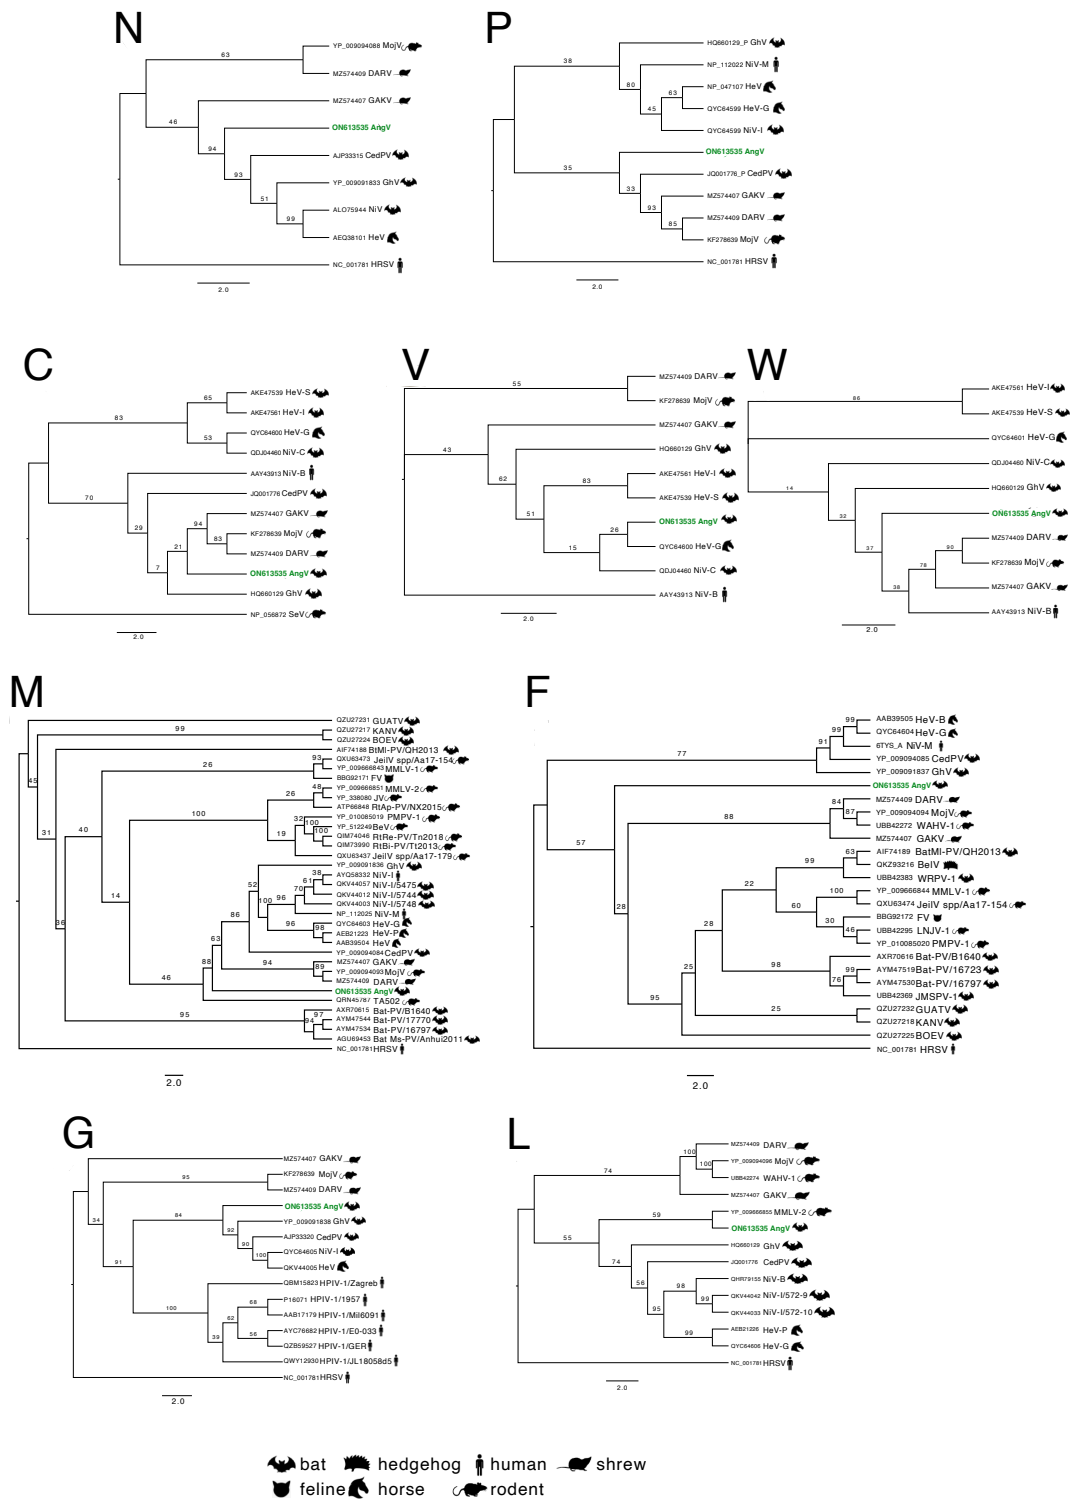

24

25 **Supplemental Figure 3.** Phylogenetic trees of AngV proteins and top BLASTx hits. Rooted

26 phylogenetic trees, with HRSV or Sendai virus (SeV) as an outgroup. Trees for V and W proteins

27 are unrooted. Novel HNV, AngV depicted in green. Icon represents host from which depicted  
28 virus was isolated. GenBank Accessions depicted next to viral abbreviation. Bootstrap support  
29 displayed. Scale bars represent substitutions per site. Abbreviations used as follows: Bat Ms-  
30 ParaV Bat *Miniopterus schreibersii* paramyxovirus; Bat-PV Bat paramyxovirus; BelV Belerina  
31 virus; BeV Beilong virus; BtMI-ParaV Bat *Murina leucogaster* paramyxovirus; BOEV Boe virus;  
32 CedV Cedar virus; DARV Daeryong virus; FeV Feline paramyxovirus; GAKV Gamak virus; GhV  
33 Ghana bat virus; GUATV Guato paramyxovirus; HeV Hendra virus: -B Brisbane, -I Ingham isolate,  
34 -G Gympie isolate, -Proserpine isolate, -S Sandgate Isolate; HRSV Human orthopneumovirus;  
35 JeilV spp Jeilong virus species; JMSPV-1 Jingmen *Miniopterus schreibersii* paramyxovirus 1; JV J  
36 virus; KANV Kanhgag paramyxovirus; MojV Mojiang virus; MMLV-1 Mount Mabu *Lophuromys*  
37 virus 1; MMLV-2 Mount Mabu *Lophuromys* virus 2; NiV Nipah virus: -C Cambodia isolate, -B  
38 Bangladesh isolate, -I India isolate, -M Mayasia isolate; PMPV-1 Pohorje *Myodes* paramyxovirus  
39 1; RtAp-ParaV Rat *Apodemus peninsulae* Paramyxovirus; RtBi-ParaV Rat *Bandicota indica*  
40 paramyxovirus; RtRe-ParaV *Rattus exulans* paramyxovirus; SeV Sendai virus; TA502 Ruloma  
41 virus; WAHV-1 Wenzhou *Apodemus agrarius* henipavirus 1; WRPV-1 Wufeng *Rhinolophus*  
42 *pearsonii* paramyxovirus 1.

43

44

45

46

47

48

1 10 20 30 40

```

AngV-G .....MSQKKSLIKGHSDYSF.KDKNQSSKYYNSYESDQD...TINPNEFKCMLTL
Niv-G .....MPAENKVKVRFENNTTSDGKIPBKVLSKYYGTMIDIKKI...NEGLLDSKILSAF
HeV-G .....MMADSKLVSLNNLSGKIKDQGVKLNYYGTMIDIKKI...NDGLLDSKILSAF
MojV-G .....MATNRDNNTITSAEVSQEDKVKYYGVEIAEKV...ADSTSGNKFVILM
CedPV-G MLSQLQKNYLDNSNQGGDKMNNPDKKLSVNFNPLELKGQKDLNKSYYVKNNYVSNLLESLSHDIKVFIYC
GhV-G .....MPQKTVFVINMNSPLERGVSTLSDKKTLLNQSKITKGGYFGLGSHSERNNKKQK...NQNDHYITVTSMTI
GAKV-G .....MDKIMAKNNNNKVN.TRETTVKKFGVDTAEKV...ADSTISNKIFILLI
DARV-G .....LMSPKIDTNKTAETSDS...LKKYGVDSVERE...ADGVTNNKIFILLA

```

50 60 70 80 90 100 110 120

```

AngV-G IFLVLLLTIASVIVLGLICNVVKLDHESKQISITNTMSINKATGKTNEIYSLTNNELKIRMMVMDTAVNVDIAD
Niv-G NTVIALLGSIVIVMNIIMIQNYTRSTDNQAVIKDALQGIQQQIKGLADKIGTEIGPKVSLIDTSSITITIPAN
HeV-G NTVIALLGSIIIIVMNIIMIQNYTRSTDNQAVIKDALQGIQQQIKGLADKIGTEIGPKVSLIDTSSITITIPAN
MojV-G NTLILLTGAIIITLNIITNLTAASKQQNMLKIIQDDVNAKLEMFVNDQLVKGGEIKPKVSLINTAVSVSIFGQ
CedPV-G IFSLLIITIIINIIITISIVITRLKVVHEENNGMESPNLQSIQDSSLSTNNMINTIETPRIGILVTATSVTFLSSS
GhV-G LEILVVVLGIMFNLIIVLTMVYVQNDNINQRMALTSNITVNLNLNQLTNNKIQREIIPRIILIDTATTITITISA
GAKV-G NTLIIITSSVITITLNIITNLEGIKNQNAIITLQMEIMNKVETISKLEQIVKGDLPKPVTLINSVAVSVIIFGQ
DARV-G NMLLIITSSVIMISLNIITNLENLNNQKTSLKILNEDVTVNKLQEDDTDQIVKGEIKPKLTLVNSAVSVIIFGQ

```

130 140 150 160 170 180 190

```

AngV-G ISALSMKIIISATTSIEELIQSQTSVSPSNRPSMNNQSGGSSGSSQLSNSRIPDPQGNPNYCNIDKPNRPSMSF
Niv-G HGLLGSKISQSTASINENVNEKCL...KFTLPLPKIHECNISCPNPLPFR...EYRFPQTEGV
HeV-G HGLLGSKISQSTASINENVNEKCL...KFTLPLPKIHECNISCPNPLPFR...EYRFPISQGV
MojV-G HSNLQTKFLQKVVYLEESITKQCTC...NPLSGIFPISGPTYPPTD...KPDDDT...DDDKVDITTI
CedPV-G HINIVYGTKNQVLNLELKYITKSC...GFKVPELKLHECNISCADPKISK...SAMYSTNAY
GhV-G HNTYLLATLITTRISELLPSINQKCL...EFKFTPLVLNLCRINCTPPLNPS...DGVKMSSLA
GAKV-G HSNLQTKMSQRLLKFIEDSVIQCTC...NPLSGIFPSKPEPKPEHPTEDDDT...DDDKVDSI
DARV-G HSNLQTKLNINIKLLEVAVNKQCSG...NLLGGLLTPKFPPTGSGTISPDGPNPD...DNVDDLEGDM

```

200 210 220 230 240 250 260

α β6S4 β1S1 β1S2

```

AngV-G TSLNIIITPTEISAYTEGCHTETVLTSEEQFQLVPLNQLLALGDIYGEDYCSRYPSLSLRGRRFTYTEERYRGSSTR
Niv-G SNLVGLPNNIIL...KQTSNQILKPKLISYTLFVVGQSGTCITDPLLAMDGEYFAYSHLERIGSSSRG
HeV-G SLDLVLPNIQCL...KQTTSTILKPRLLISYTLFINTREGVCTIDPLLAVDNGFAYSHLEKIGSSSRG
MojV-G KPIEYYPKDFGNRTGDHF...TMEPGANFYTPV...NLGPASINSDECYTNPSEFISGSSIYMPFQERKTDCTAG
CedPV-G DSFLVLSHGIVDRGDIRPESLYLSSHYHFPYSMQVINCVPTVCNQSFFVREHISNNTKTLDNSDYSSEYI
GhV-G TNLVAHGSPGR...NFSSVPTIYYRIPGLYNRTALDERCITLNPRLTISSTFAVHSEYDKNCTRG
GAKV-G QSFLYPSFTVNNSDETT...SIIPGPNLYAVP...NLSIKEDDEDECVTNPSEFVSGTSLIYMSQERKTDCTRG
DARV-G RPLNLAELNDQSRYPQTPNPTFAISPDITHPMP...ELTEPIQLKMHCAVFPVVALGESIYVYSHQIRKTEP

```

270 280 290 300 310 320 330

β1S3 β1S4 α β2S1 β2S2 α β2S3

```

AngV-G TKEAQIIVYGVITDFGVRHPTLMIIDTFNPNYDMITYRCTSVTKLSTGLVLCVLTNNMTFFELYSPKNTDIT
Niv-G VSKORIIIGVEVLDVRGDEVPFLFMINTVMTPPNPNITVYHCSAVYNNFEYFVVICAVSTVGDPLLNSTYWSGSLMM
HeV-G IAKORIIIGVEVLDVRGDKVPSMFMINTVMTPPNPNSTIHHCSSTYHEDFYFYTICAVSHVGDPLLNSTSWTESLSL
MojV-G EILSIQIVLGRIVDKGQGGPQASPLLWAVPNPKIINSCAVAAGDEMGWVICSVTLTAASGEPIPHMFDGFWL
CedPV-G DSFLVLSHGIVDRGDIRPESLYLSSHYHFPYSMQVINCVPTVCNQSFFVREHISNNTKTLDNSDYSSEYI
GhV-G FKYTYELMTFGEILEGPEKPERMFSRSFYSPTNAVNHYHCTPIVTVNEGYFICLECTSDDPLYKANLNSNTEHLL
GAKV-G PLTGIKILGRIVDKGQFGPQVSPILLVMDVPKPETINSCAVVAEDDEVGWAICSIITSIANSGEPIPYLLSGFKL
DARV-G DTIHQRVSLGRIVDRGFGSPPRASPLSTWDLQETEFLSGCAVVAASGEGWVICTVTDKFTTRDVTYAGPYTGKLL

```

340 350 360 370 380 390 400

TT β2S4a α β2S4b β3S1a β3S1b β3S2a β3S2b TT

```

AngV-G FEAFDGSQHK...GTILNSSKFIYINDIDMFIIPGTGGCIYLNRTIYLPGLVFTTNPFDGNAGCPNSA...
Niv-G TRILAVKPKSNGGGVYHQHQLALRSIEKGRYDVMFYGPSCGIKQGDLYFPFVAVGFLVRFTEF...KYNDNSNCFITK
HeV-G IRLAVRPKSDSGDYNQYIAITKVERGKYDKVMPYGPSCGIKQGDLYFPFVAVGFLPRTFTEF...QYNDNSNCFITK
MojV-G YKLVDPDTEVV...SYRITGYAYLLDKQYDVFVIGKGGCIQKNDLYFQMYGLSRNRSFKALEHSGSLGTGT
CedPV-G TYFRNGIDRPK...TKKIPINMTADNRYIHFTFSGGGCVCLGEEFIIPVITVINIDVFTHDYCESFNCSVQT
GhV-G VILFRHNKDEK...IVSMPSFNLSSTQEVYVQIIPAEAGGCTAESGNLYFPFCIGRLLHKKVTHPLKCKSN...
GAKV-G FKFEPDSSEVV...QYVLSGKSFRLDRVYHTLYVKGKGAARYDGLYFEGFVITNIGKQDPLCNHGK...SG
DARV-G YKLSIRGQKE...EYSITANNITDVAIILALTLTRGSGVPKNNKLIPLGLAAVRLDVTGVLVLPETWK...EN

```

410 420 430 440 450 460 470

α β3S3 β3S4a β3S4b β4S1 β4S2 TT

```

AngV-G TNKDPKILCRKGLKFIYFNNSYVMVNGFALISQKGRKEYEIVTVMTEITDVIYHGGSRVQYFNNSRAKYQAFNGW
Niv-G QYSKPEENRLEMGIRPNSHYILRSGLLKYNSLDGENPKVVFLEISDQRLSISGSKYIDSLGQVFPYQASFSW
HeV-G KYSKPEENRLEMGVNSKSHYILRSGLLKYNSLDGCDIILQPIEADNRLSISGSKYINSLGQVFPYQASFSW
MojV-G GGGYQVLEDRAVMSFGSESLITNAYLVKNDLASKGPIVIGQTFPPSDSYSGSNRMYTIGDKVGLYLAPSSW
CedPV-G GSKLKEIISESLRSPNSTRYLNNGIMTISQNNMDFKITQLNGNITYNKLSRSGPRLSKITLQVLYYQSSSW
GhV-G SRTDDEGLKSYNQGSPHQHVQVNLIRIRNAQRDNPVMDVITVDLNTVYSGSSRIFGFSFKPMLYQSSSW
GAKV-G SGSYIPIGLSAMSMMGDITDFLVVSNIIKVVVDANIGKVPITVQTFKIQDITYKSGHGRIVQMDNNYGIYLAASSW
DARV-G INNNVGSVHSEYRLTADNNYFMNVVAVDVTFPKMTASVLSLPMSESYSGSEGGVIDKPGGYGLMISNKGW

```

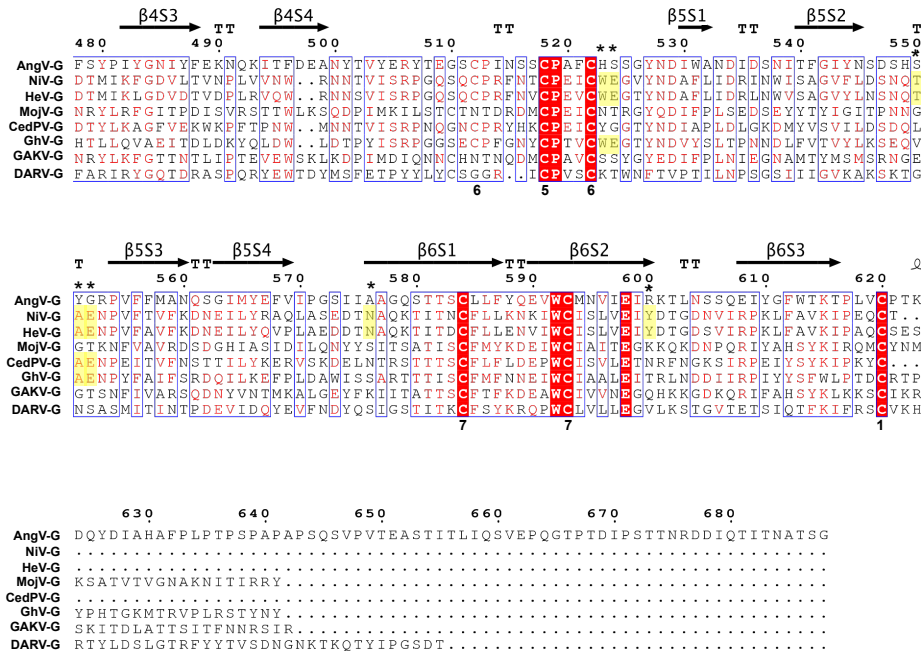

51

52 **Supplemental Figure 4.** Structure-based alignment of the HNV G protein sequences. The  
53 alignment was done with MultAlin (2) and visualized using ESPRIT (3). Residues highlighted red  
54 are fully conserved and residues colored red are partially conserved. Disulfide bonds 1 through  
55 6 are indicated numerically underneath the alignment. Notably AngV G protein disulfide bonds  
56 1, 4, and 5 do not align across all HNVs. Homologous residues have been highlighted pink, blue  
57 and green for disulfide bonds 1, 4, and 5, respectively. Virus name (abbreviation) GenBank  
58 Accession: Angavokely virus (AngV) ON613535, Cedar virus (CedV) JQ001776; Daeryong virus  
59 (DARV) MZ574409; Gamak virus (GAKV) MZ574407; Hendra virus (HeV) AF017149; Mojiang  
60 virus (MojV) KF278639; Nipah virus (NiV) AF212302; Ghanaian bat Henipavirus (GhV)  
61 HQ660129.

62

63



64 **Supplemental References**

65 1. Douglas J, Drummond AJ, Kingston RL. 2021. Evolutionary history of cotranscriptional  
66 editing in the paramyxoviral phosphoprotein gene. *Virus Evolution* 7.

67 2. Corpet F. 1988. Multiple sequence alignment with hierarchical clustering. *Nucleic Acids*  
68 *Research* 16:10881–108890.

69 3. Gouet P, Courcelle E, Stuart DI, Métoz F. 1999. ESPript: analysis of multiple sequence  
70 alignments in PostScript. *Bioinformatics* 15:305–308.

71
